# Supplementary material
Source: publisher figshare collection journal article supplement (https://acs.figshare.com/ndownloader/files/4384258)
Supplement: Supplementary file 1 [file 4384258]

**Fig. S6 Conserved subnetworks between *M. tuberculosis* and *Synechocystis* sp.**

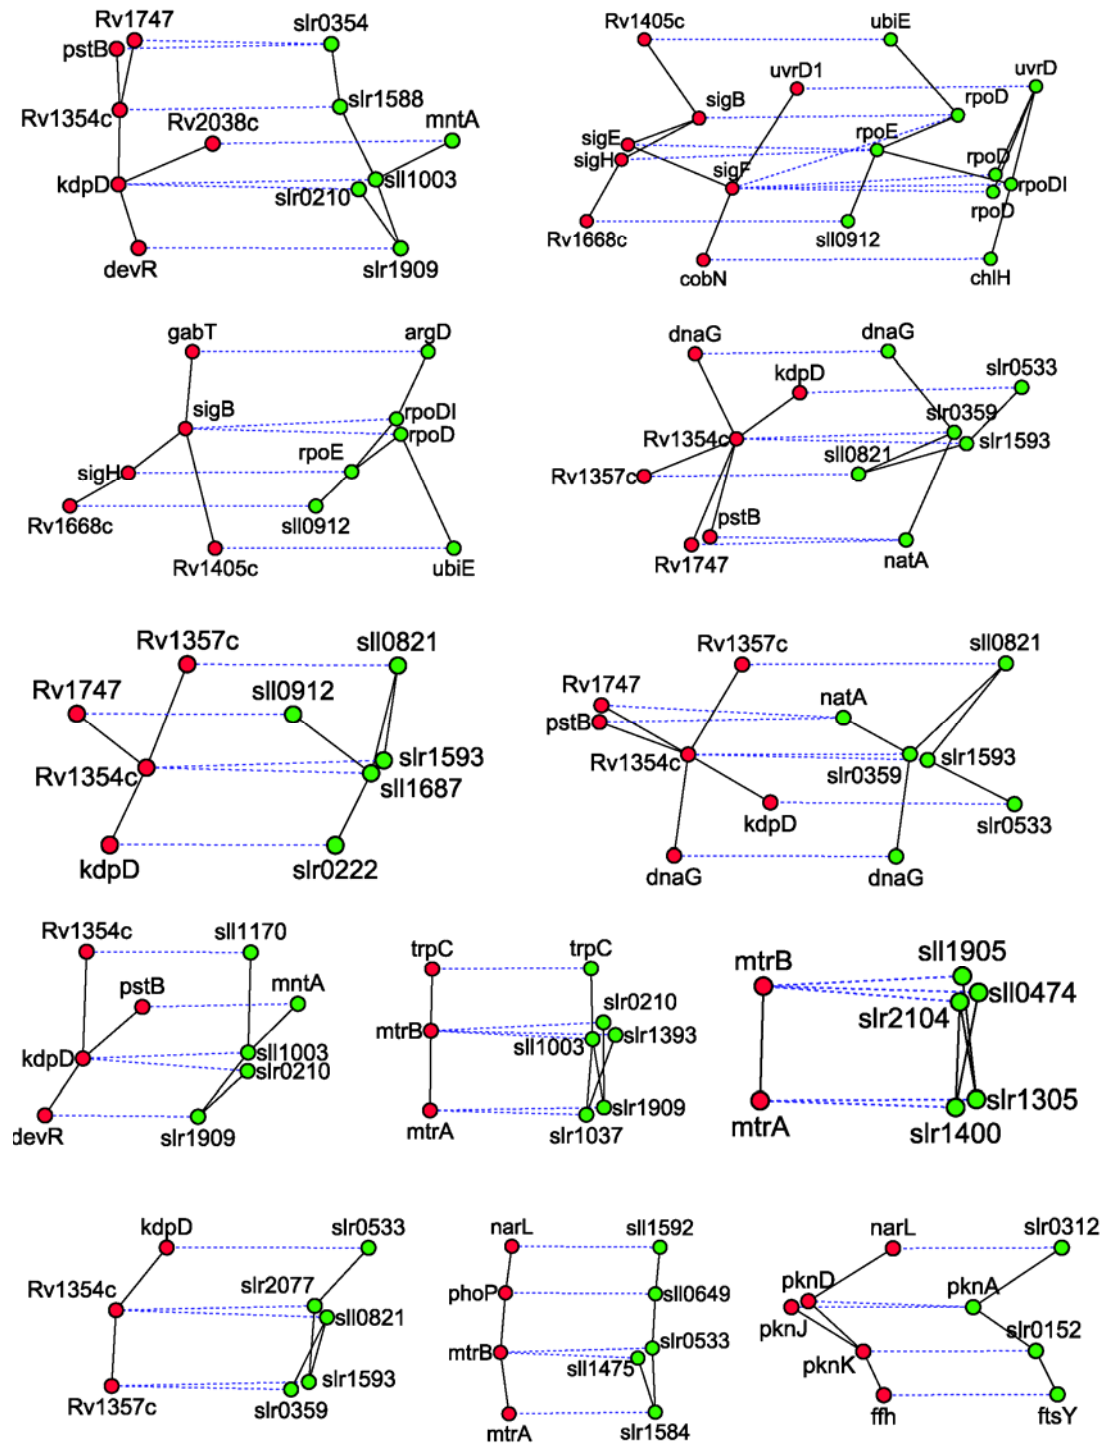

12 conserved subnetworks were identified between *M. tuberculosis* and *Synechocystis* sp using NetworkBlast. Red nodes represent the proteins from *M. tuberculosis* and green from *Synechocystis* sp. Blue dash line indicate cross-species sequence similar between proteins.
